# Supplementary material for: Temperature variable luminescence and color tuning of Eu2+/Mn2+-codoped strontium magnesium phosphates as promising red-emitting phosphors for light emitting diodes
Source: Royal Society of Chemistry journal article supplement (doi:10.1039/c4dt02457e), 2014-10-27

# Supplementary/Supporting Information

Fig. S1 Compatibility triangles in part of SrO-MgO-P<sub>2</sub>O<sub>5</sub> systems and the representative compounds.

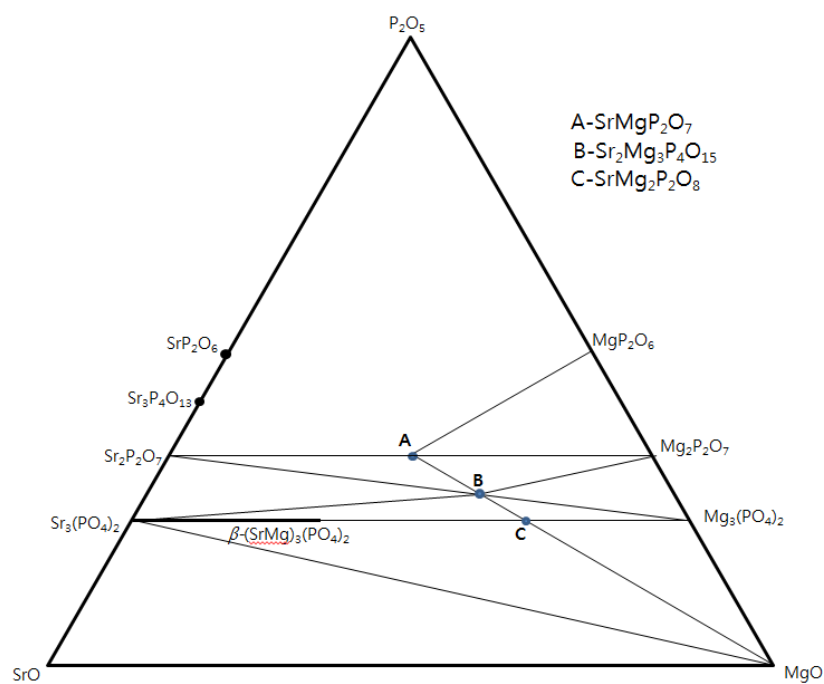

Fig. S2 Emission spectra of the  $\text{Eu}^{2+}$  (black line) or  $\text{Mn}^{2+}$  (red line) singly doped strontium magnesium phosphates; (a)  $\text{SrMgP}_2\text{O}_7$ , (b)  $\text{SrMg}_2\text{P}_2\text{O}_8$  and (c)  $\text{Sr}_2\text{Mg}_3\text{P}_4\text{O}_{15}$ .

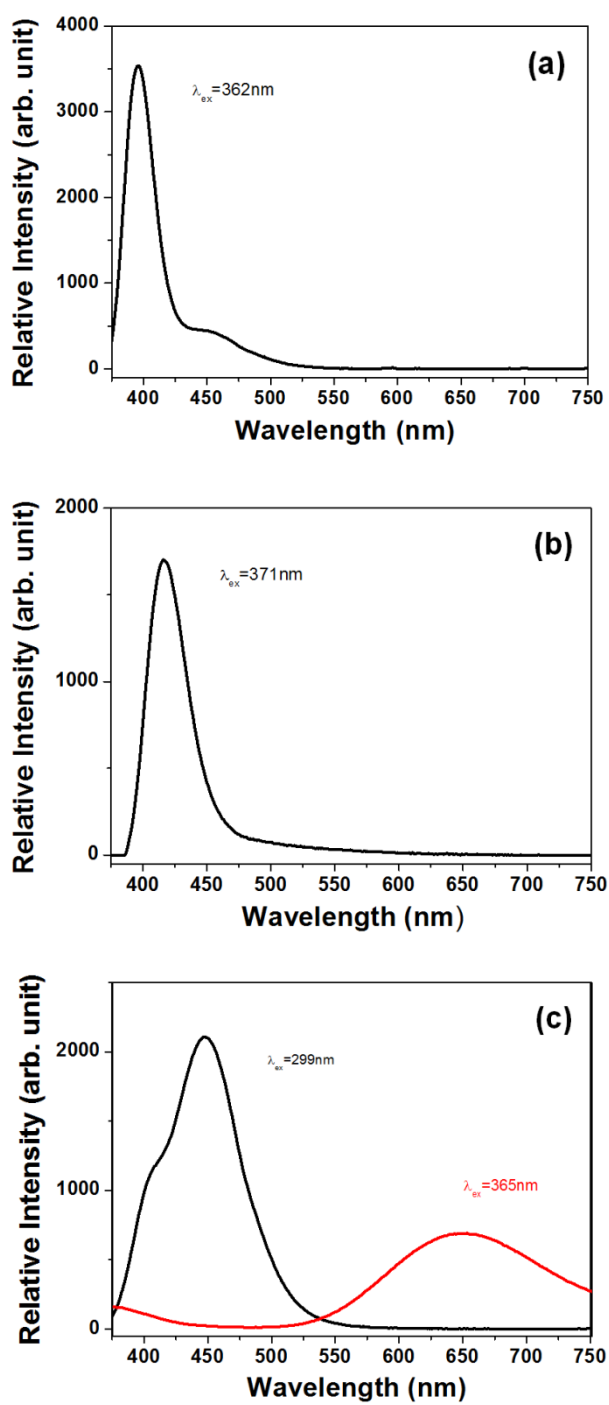

Fig. S3 Comparative emission spectra of the  $\text{Eu}^{2+}/\text{Mn}^{2+}$  codoped strontium magnesium phosphates,  $\text{SrMgP}_2\text{O}_7$ ,  $\text{SrMg}_2\text{P}_2\text{O}_8$  and  $\text{Sr}_2\text{Mg}_3\text{P}_4\text{O}_{15}$ .

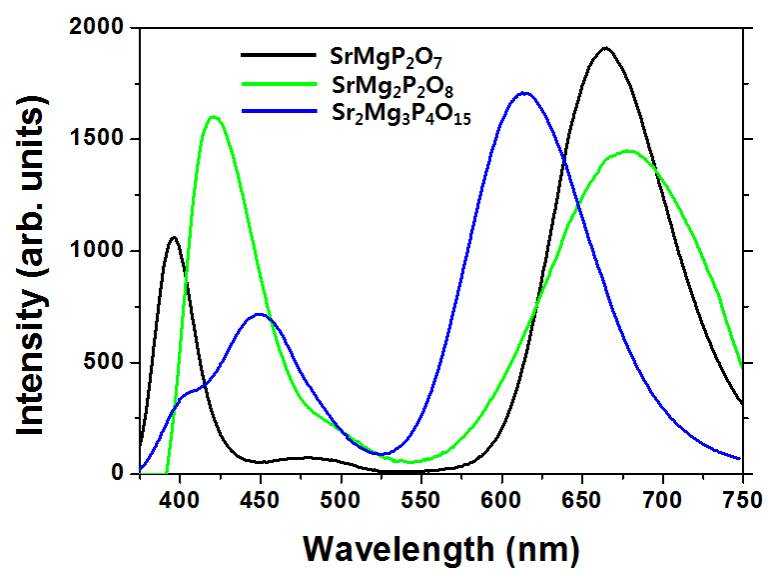

Fig. S4 Views of the structure along (001) with the  $\text{Sr}_{2+x}\text{Mg}_{3-x}\text{P}_4\text{O}_{15}$  unit cell outlines.

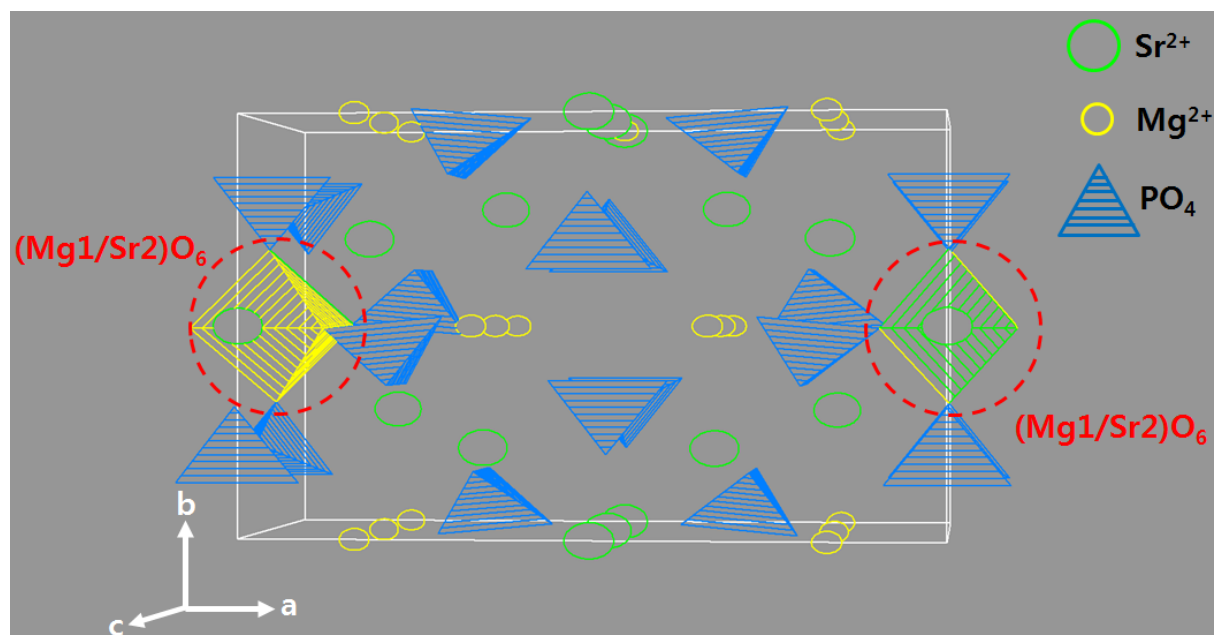

Supplement: c4dt02457e1.pdf [file c4dt02457e1.pdf]
